# Supplementary material
Source: publisher figshare collection journal article supplement (https://frontiersin.figshare.com/ndownloader/files/15302171)
Supplement: Supplementary file [file 15302171]

## Supplementary material: Appendix B

**Table 1. Differences in (bio)marker trajectories between those with and without incident cognitive frailty, stratified by sex.**

| Markers and biomarkers   | Men      |            |          |            |          |            | Women        |              |              |              |              |              |
|--------------------------|----------|------------|----------|------------|----------|------------|--------------|--------------|--------------|--------------|--------------|--------------|
|                          | Model 1  |            | Model 2  |            | Model 3  |            | Model 1      |              | Model 2      |              | Model 3      |              |
|                          | $\chi^2$ | Pr > ChiSq | $\chi^2$ | Pr > ChiSq | $\chi^2$ | Pr > ChiSq | $\chi^2$     | Pr > ChiSq   | $\chi^2$     | Pr > ChiSq   | $\chi^2$     | Pr > ChiSq   |
| Self-reported health     | 9.22     | 0.101      | 1.93     | 0.858      | 1.39     | 0.926      | 3.55         | 0.616        | 2.91         | 0.714        | 2.78         | 0.734        |
| BMI                      | 2.28     | 0.809      | 3.21     | 0.668      | 4.36     | 0.499      | 2.22         | 0.818        | 0.71         | 0.983        | 0.51         | 0.992        |
| Waist circumference      | 2.79     | 0.733      | 2.79     | 0.733      | 3.17     | 0.673      | 2.12         | 0.833        | 2.42         | 0.788        | 3.58         | 0.612        |
| Systolic blood pressure  | 1.43     | 0.921      | 0.95     | 0.966      | 0.93     | 0.968      | 4.04         | 0.544        | 3.11         | 0.683        | 2.45         | 0.785        |
| Diastolic blood pressure | 1.97     | 0.854      | 2.93     | 0.712      | 3.60     | 0.609      | 1.38         | 0.927        | 0.56         | 0.990        | 0.63         | 0.987        |
| Total cholesterol        | 8.17     | 0.147      | 7.22     | 0.205      | 7.37     | 0.195      | <b>10.32</b> | <b>0.067</b> | <b>10.59</b> | <b>0.060</b> | 9.01         | 0.109        |
| HDL cholesterol          | 8.83     | 0.116      | 5.92     | 0.314      | 5.15     | 0.398      | 1.64         | 0.897        | 1.98         | 0.853        | 2.45         | 0.784        |
| Glucose                  | 2.66     | 0.752      | 3.46     | 0.629      | 3.63     | 0.604      | 4.02         | 0.547        | 3.93         | 0.559        | 4.27         | 0.511        |
| Triglycerides            | 5.07     | 0.408      | 5.36     | 0.373      | 4.66     | 0.459      | 3.56         | 0.614        | 2.36         | 0.797        | 2.32         | 0.803        |
| ALT                      | 6.64     | 0.249      | 5.77     | 0.330      | 5.87     | 0.319      | 8.17         | 0.147        | <b>11.29</b> | <b>0.046</b> | <b>12.96</b> | <b>0.024</b> |
| GGT                      | 2.31     | 0.804      | 2.23     | 0.817      | 2.34     | 0.800      | <b>15.71</b> | <b>0.008</b> | <b>17.48</b> | <b>0.004</b> | <b>20.05</b> | <b>0.001</b> |
| CRP                      | 5.02     | 0.413      | 5.91     | 0.315      | 4.62     | 0.465      | 6.96         | 0.223        | 7.31         | 0.199        | 8.36         | 0.138        |

|            |      |       |      |       |      |       |              |              |              |              |              |              |
|------------|------|-------|------|-------|------|-------|--------------|--------------|--------------|--------------|--------------|--------------|
| Albumin    | 7.34 | 0.196 | 6.27 | 0.281 | 6.54 | 0.257 | 8.18         | 0.147        | 6.70         | 0.244        | 6.10         | 0.297        |
| Cystatin C | 3.35 | 0.646 | 2.35 | 0.799 | 1.96 | 0.855 | 6.63         | 0.250        | 5.91         | 0.315        | 4.47         | 0.484        |
| Creatinine | 0.96 | 0.966 | 2.47 | 0.781 | 2.41 | 0.790 | 4.24         | 0.516        | 5.00         | 0.416        | 5.42         | 0.367        |
| Uric Acid  | 2.45 | 0.784 | 1.90 | 0.863 | 1.88 | 0.866 | 4.86         | 0.433        | 6.42         | 0.267        | 5.74         | 0.333        |
| Urea       | 1.18 | 0.946 | 2.69 | 0.747 | 2.87 | 0.720 | <b>19.08</b> | <b>0.002</b> | <b>17.14</b> | <b>0.004</b> | <b>14.60</b> | <b>0.012</b> |

---

Model 1: age (linear and quadratic), examination round, and time

Model 2: age (linear and quadratic), examination round, time, level of education, and depressive symptoms

Model 3: age (linear and quadratic), examination round, time, level of education, depressive symptoms, BMI, smoking, alcohol intake, and physical activity. Note: The trajectories of BMI and waist circumference were not adjusted for BMI.

Additional adjustment in all three models: Trajectories of systolic and diastolic blood pressure were adjusted for anti-hypertensive medication, trajectories of total cholesterol, HDL cholesterol and triglycerides were adjusted for cholesterol-lowering medication, and trajectories of glucose were adjusted for the use of glucose-lowering medication;

A difference (p-value for interaction<0.1) in (bio)marker trajectory between those with and without cognitive frailty is indicated in bold;

Abbreviations: BMI, body mass index; HDL cholesterol, high-density lipoprotein cholesterol; ALT, alanine aminotransferase; GGT, gamma glutamyltransferase; CRP, C-reactive protein.

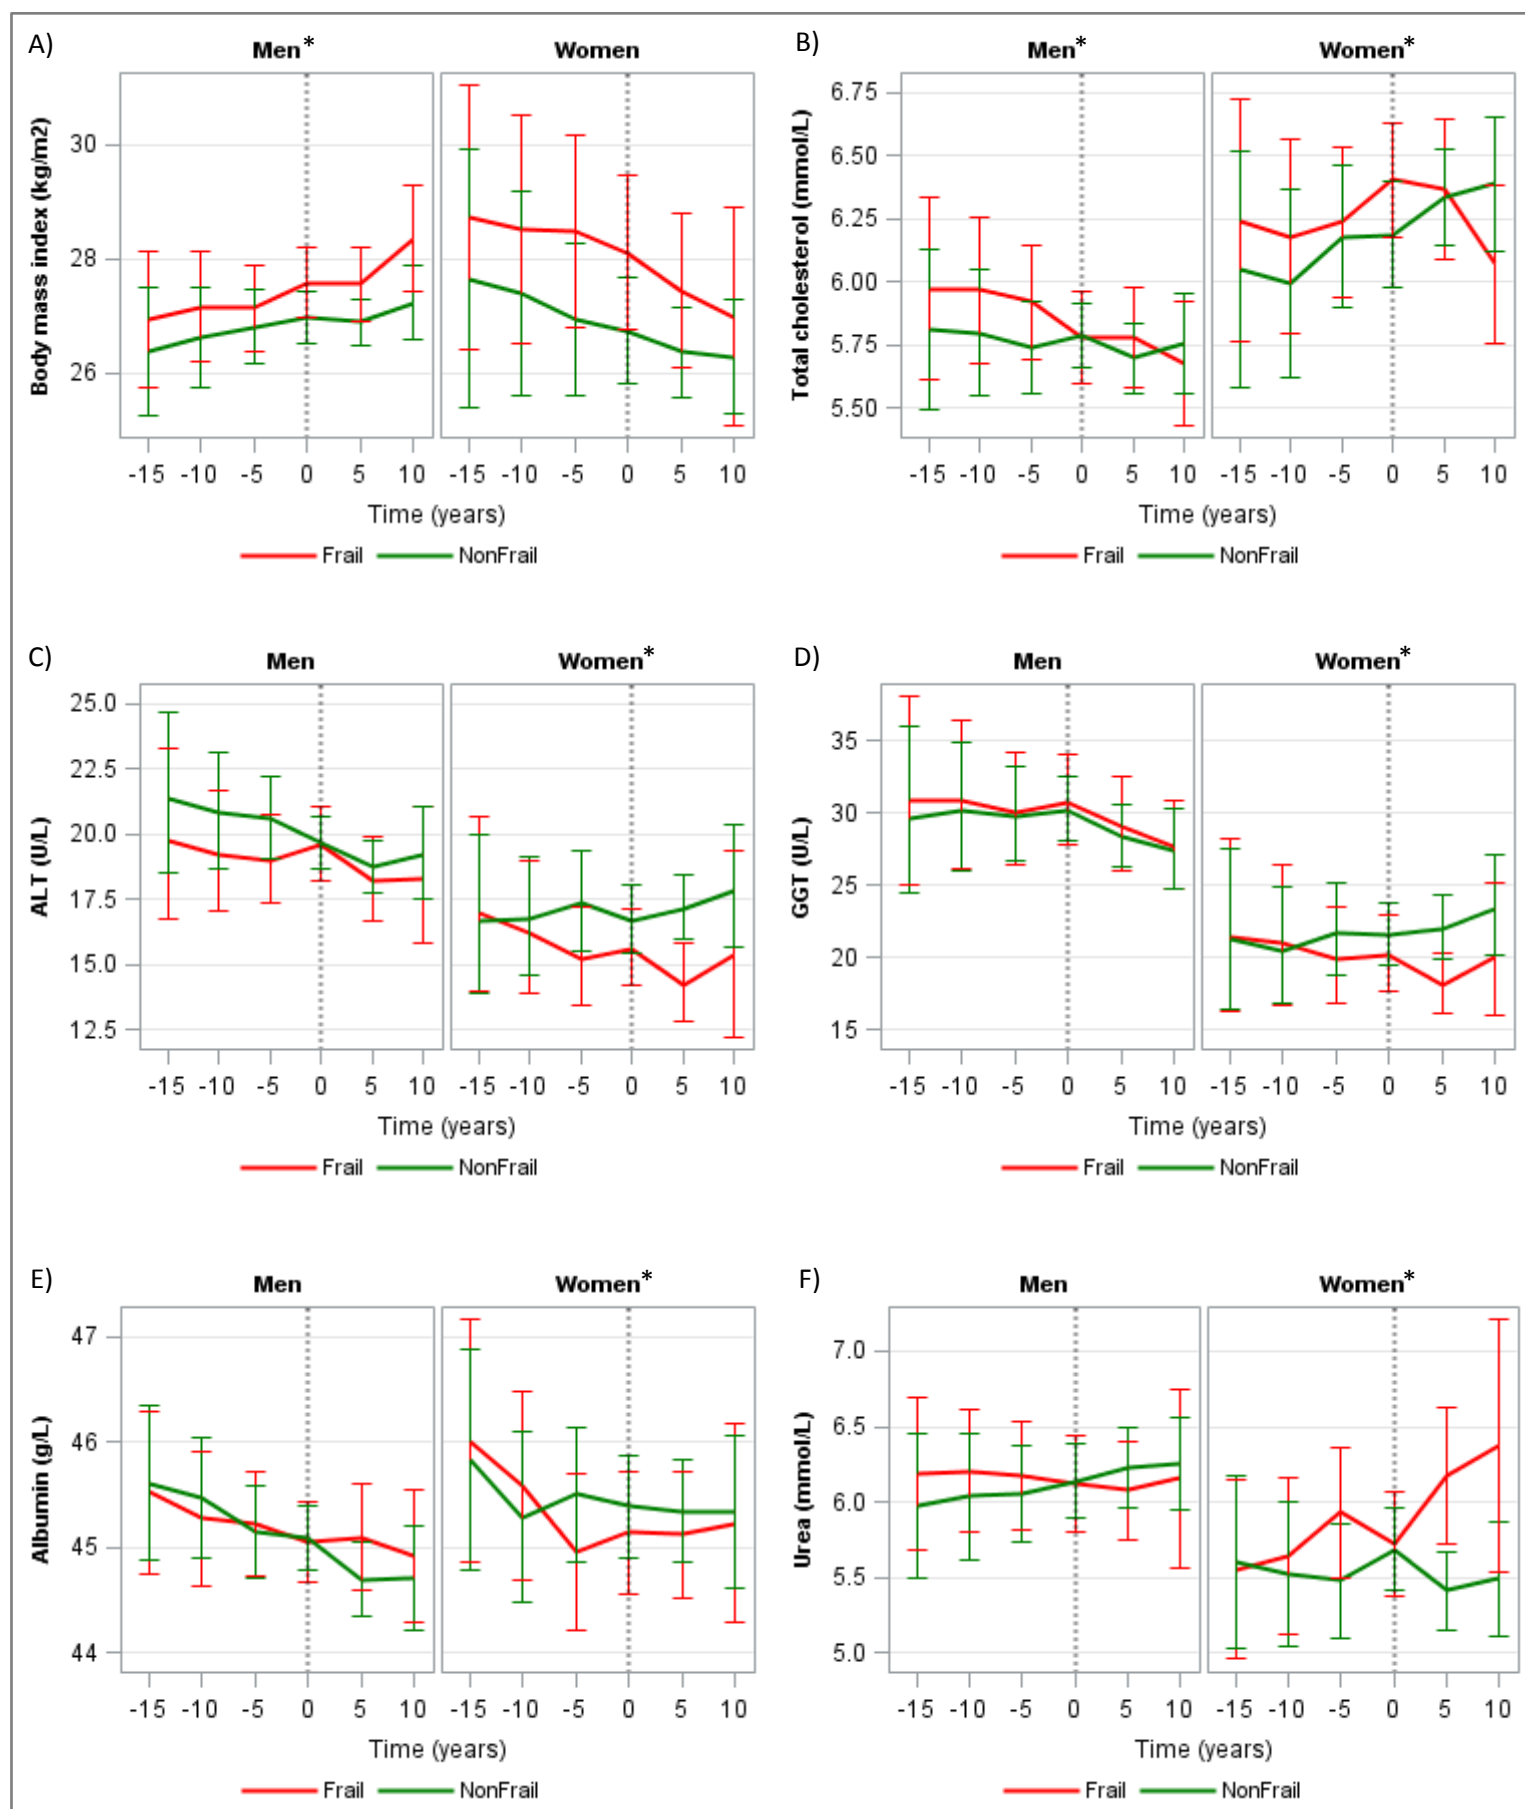

**Figure 1. Sensitivity analysis for loss to follow-up due to mortality.**

Participants who died during the follow-up period (1993-2012) along with their matched case and/or control(s) were excluded in these analyses (n=333). Trajectories are shown of body mass index (A), total cholesterol (B), ALT (C), GGT (D), albumin (E), and urea (F) of incident cognitively frail people (red lines) and controls (green lines) with 95% confidence intervals stratified by sex and corrected for age and, if appropriate, medication use (model 1), where men and women were hypothetically 60 years old at the time of incident cognitive frailty. A difference (p-value for interaction<0.1) in (bio)marker trajectory between those with and without incident cognitive frailty are indicated by an asterisk.

Abbreviations: ALT, alanine aminotransferase; GGT, gamma glutamyltransferase. Geometric means are shown for ALT and GGT.
